# Supplementary material for: Mogroside-rich extract fromSiraitia grosvenoriifruits protects against the depletion of ovarian reserves in aging mice by ameliorating inflammatory stress
Source: Royal Society of Chemistry journal article supplement (doi:10.1039/d1fo03194e), 2021-12-06
Supplement: d1fo03194e1.pdf [file d1fo03194e1.pdf]

**Table S1. Primer sequences used for real-time RT-PCR**

| Gene           | Forward primer (5' → 3') | Reverse primer (5' → 3') |
|----------------|--------------------------|--------------------------|
| <i>P16</i>     | CGCAGGTTCTTGGTCACTGT     | TGTTACGAAAGCCAGAGCG      |
| <i>Foxl2</i>   | ACAACACCGGAGAAACCAGAC    | CGTAGAACGGGAACCTGGCTA    |
| <i>Gdf9</i>    | CAAGTACAGCCCCCTGAGTG     | CACTCTAAGGCCACAGCAT      |
| <i>Bmp15</i>   | TGCTTTGGAGATTAGGAGAGAGTG | CCCTCAGGGATTAAAGTAGAGC   |
| <i>Cyp11a1</i> | AGGTCCTTCAATGAGATCCCTT   | TCCCTGTAAATGGGGCCATAC    |
| <i>Hsd3b1</i>  | AGCTCTGGACAAAGTATTCCGA   | GCCTCCAATAGGTTCTGGGT     |
| <i>Star</i>    | TGTTAAGGACTGCCACCACATCT  | TGTCCTTGGCTGAAGGTGAACAGA |
| <i>Tnfa</i>    | CCTGTAGCCCACGTCGTAG      | GGGAGTAGACAAGGTACAACCC   |
| <i>Il6ra</i>   | GCCACCGTTACCCTGATTTG     | TCCTGTGGTAGTCCATTCTCTG   |
| <i>Il10rb</i>  | GCCACCGTTACCCTGATTTG     | TCCTGTGGTAGTCCATTCTCTG   |
| <i>Il2</i>     | TGAGCAGGATGGAGAATTACAGG  | GTCCAAGTTCATCTTCTAGGCAC  |
| <i>Tgfb1</i>   | CCACCTGCAAGACCATCGAC     | CTGGCGAGCCTTAGTTTGGAC    |
| <i>Lc3</i>     | CATGAGCGAGTTGGTCAAGA     | TTGACTCAGAAGCCGAAGGT     |
| <i>Gapdh</i>   | AACTGAGGACCAGGTTGTCTC    | TACTCCTTGGAGGCCATGTAG    |
